# Supplementary material
Source: ML conference proceedings conference paper supplement (https://openreview.net/forum?id=K61Y6cTMRl)
Supplement: supplementary_material [file radar_plot.pdf › NormWear-main/imgs/radar_plot.pdf]

## AUC ROC

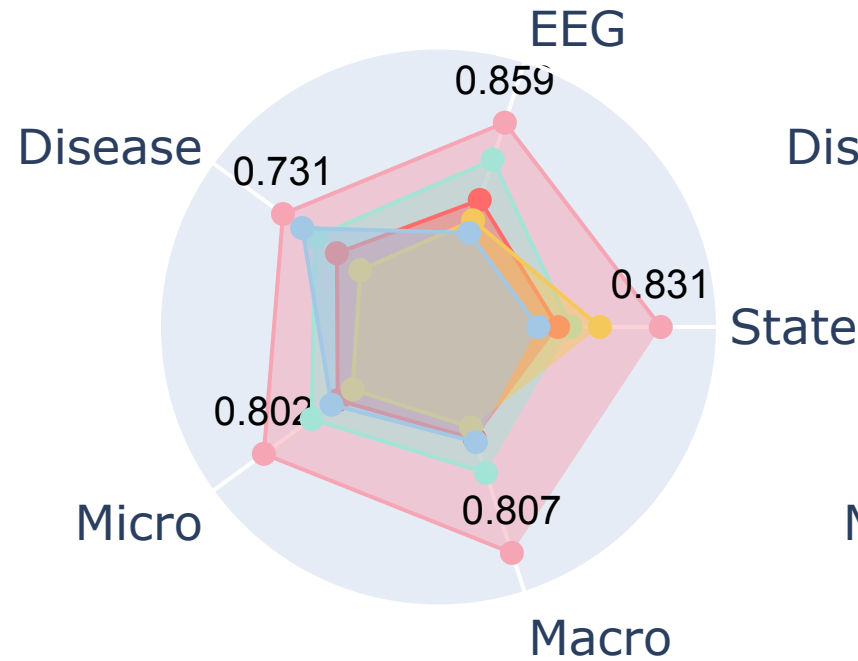

## AUC PR

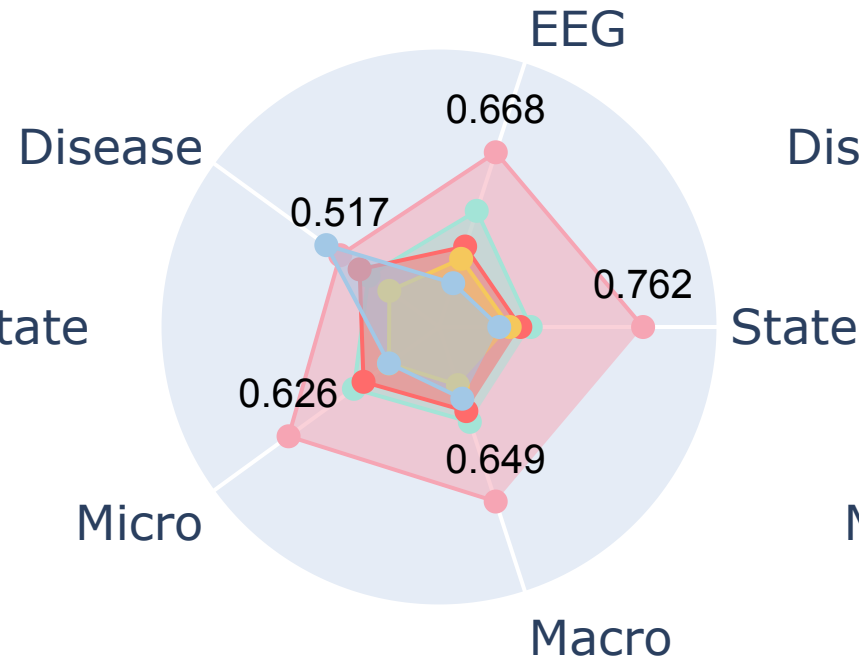

## Accuracy

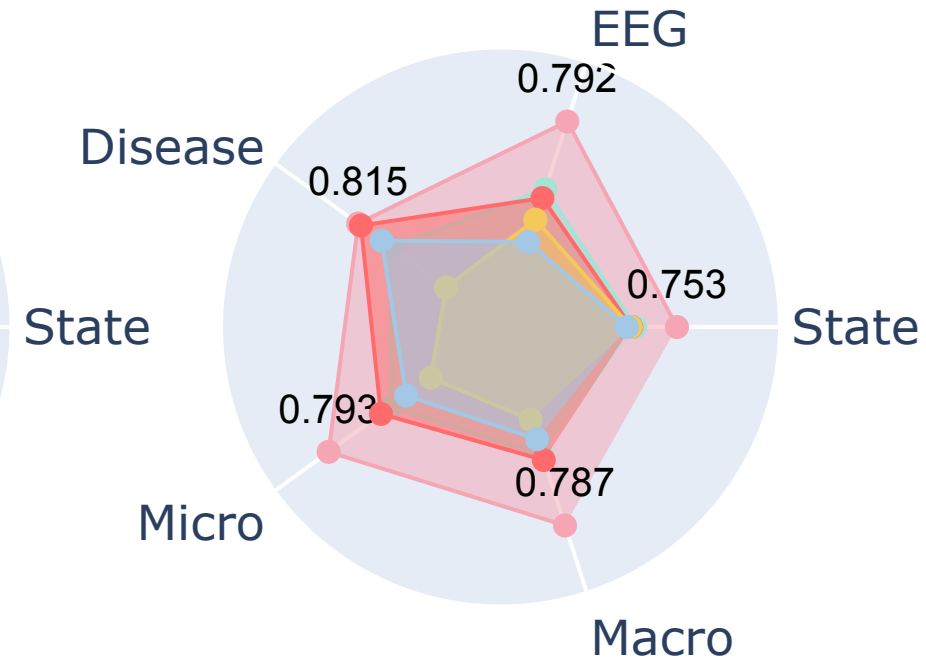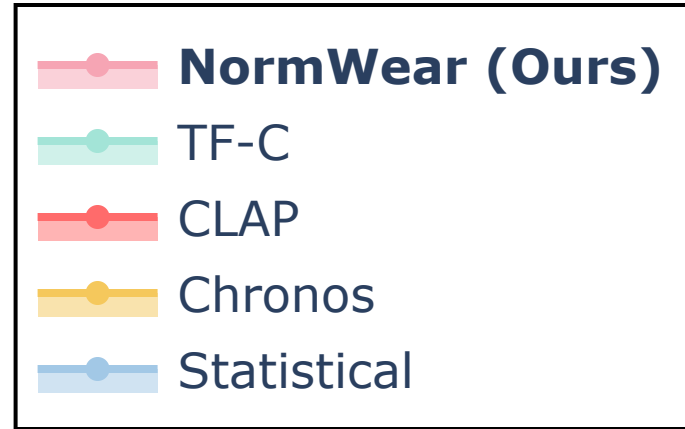

- **Disease**: Performance on disease risk predictions. | - **EEG**: Performance on main EEG tasks (mental and abnormal states prediction)
- **State**: State recognition, including physical and mental activities. | - **Macro**: Average performance over types of tasks
- **Micro**: Average performance over each task.
