# Supplementary material
Source: ML conference proceedings conference paper supplement (https://openreview.net/forum?id=K61Y6cTMRl)

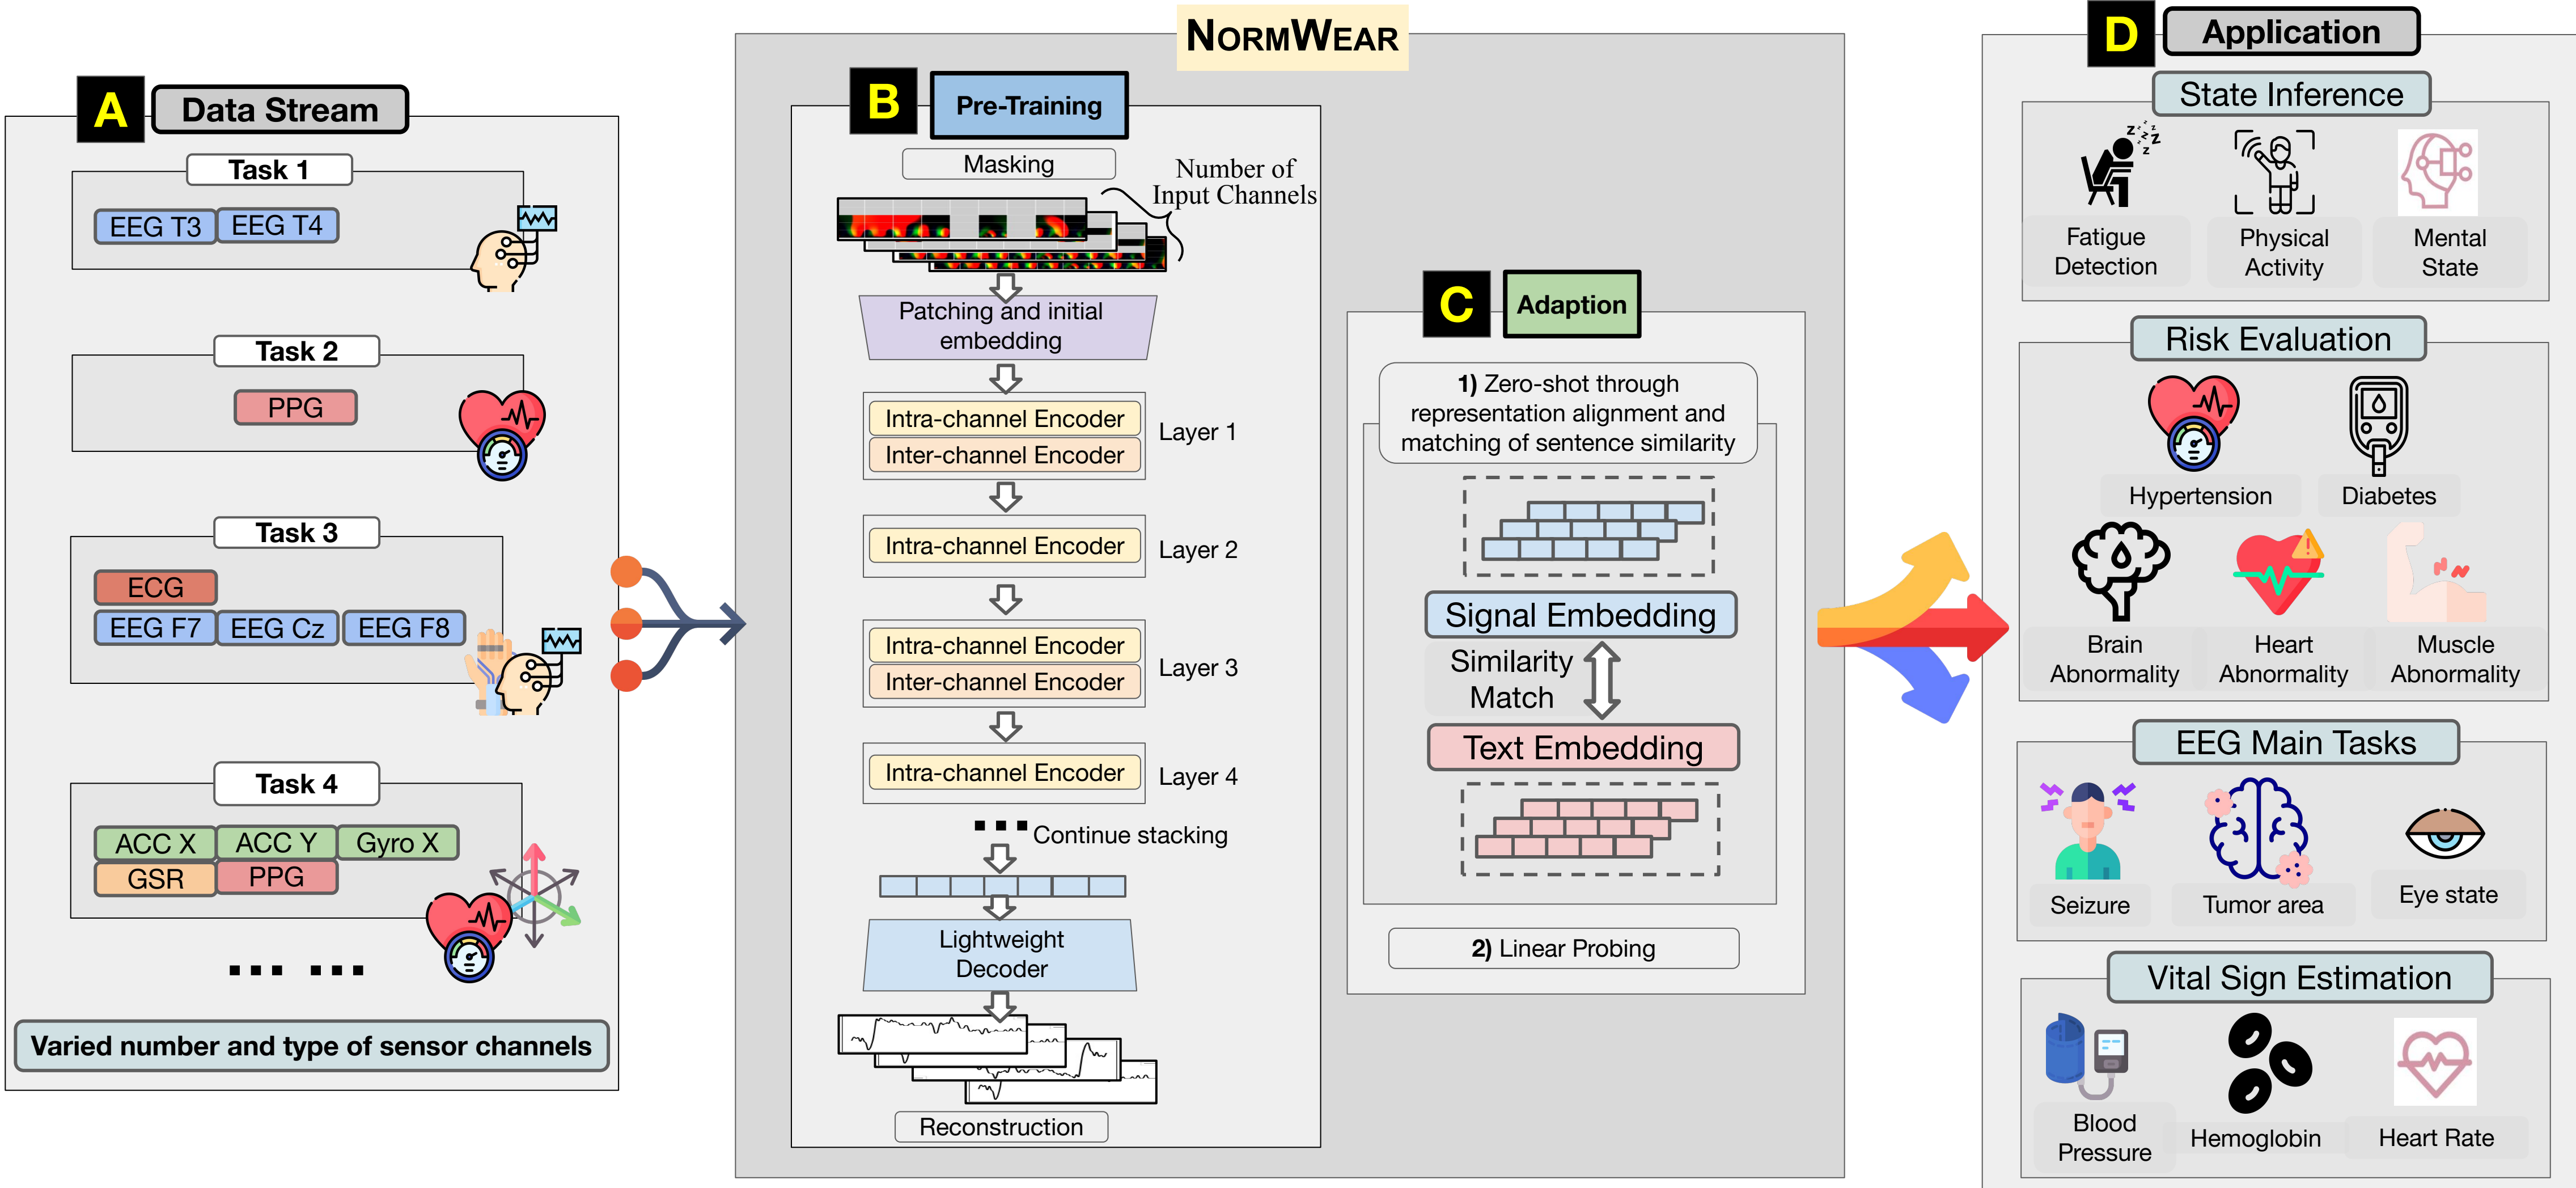

Supplement: supplementary_material [file overview-very-new.pdf › NormWear-main/imgs/overview-very-new.pdf]
